# Supplementary material for: Electron induced surface reactions of (η5-C5H5)Fe(CO)2Mn(CO)5, a potential heterobimetallic precursor for focused electron beam induced deposition (FEBID)
Source: Royal Society of Chemistry journal article supplement (doi:10.1039/c7cp07994j), 2018-01-01
Supplement: c7cp07994j1.pdf [file c7cp07994j1.pdf]

## Supporting information for

### **Electron Induced Surface Reactions of $(\eta^5\text{-C}_5\text{H}_5)\text{Fe}(\text{CO})_2\text{Mn}(\text{CO})_5$ , a Potential Heterobimetallic Precursor for Focused Electron Beam Induced Deposition**

Ilyas Unlu<sup>1</sup>, Julie Spencer<sup>1,2</sup>, Kelsea R Johnson<sup>3</sup>, Rachel Thorman<sup>1,4</sup>, Oddur Ingólfsson<sup>4</sup>, Lisa McElwee-White<sup>3</sup> and D. Howard Fairbrother<sup>\*1</sup>

<sup>1</sup> Department of Chemistry, Johns Hopkins University, Baltimore, Maryland 21218

<sup>2</sup> Department of Chemistry, US Naval Academy, Annapolis, Maryland 21401

<sup>3</sup> Department of Chemistry, University of Florida, Gainesville, FL 32611-7200

<sup>4</sup> Science Institute and Department of Chemistry, University of Iceland, Dunhagi 3, 107 Reykjavík, Iceland

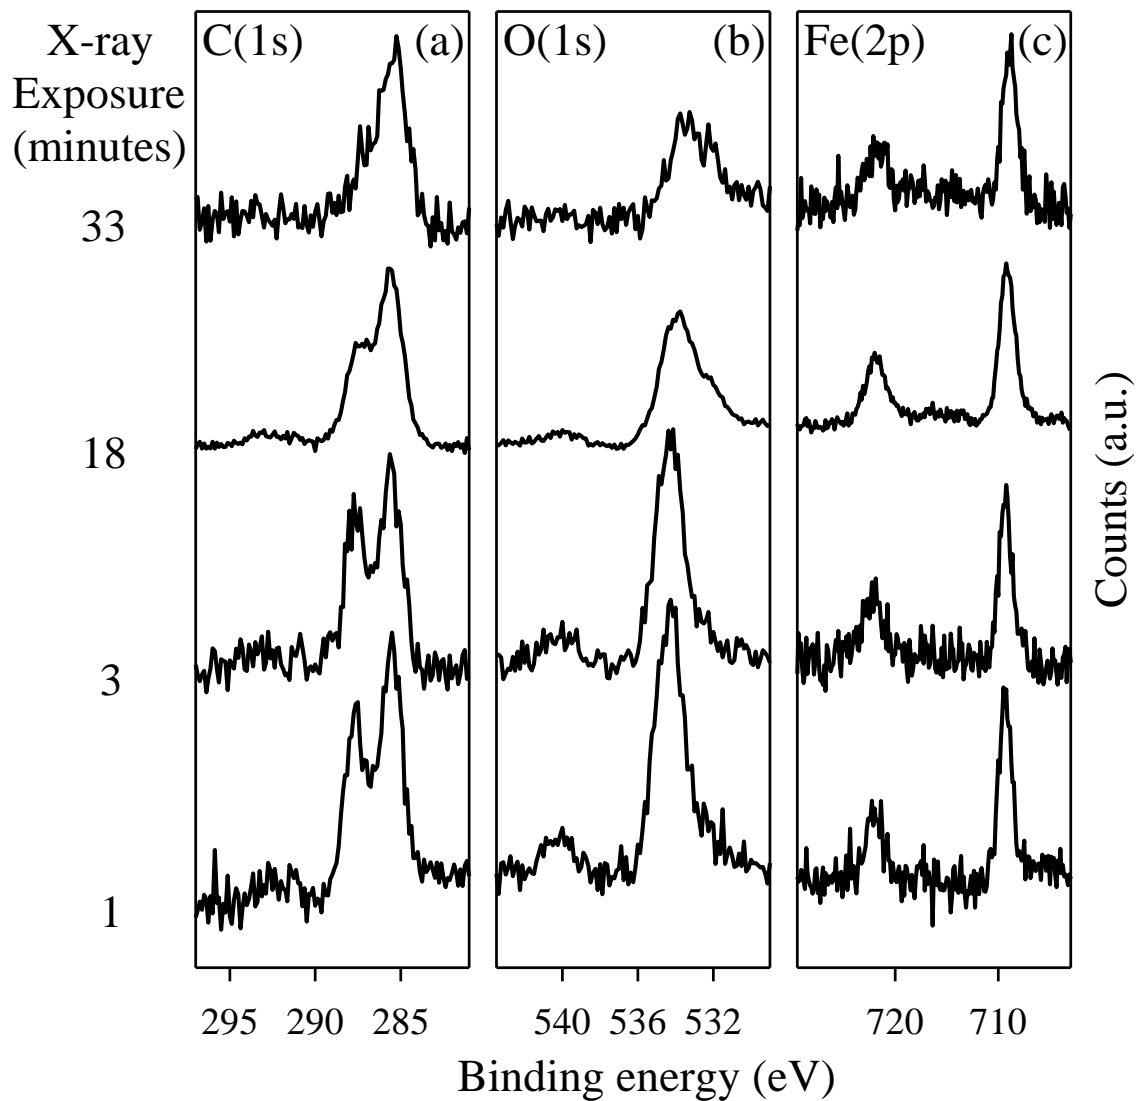

**Figure S1** Evolution of the a) C(1s), b) O(1s), and c) Fe(2p) XP regions for a  $\sim 3$  nm thick film of  $\eta^5$ - $\text{C}_5\text{H}_5\text{Fe}(\text{CO})_2\text{Mn}(\text{CO})_5$  adsorbed onto Au, irradiated only with X-rays (Mg K $\alpha$  1253.6 eV) from the X-ray gun; the X-ray exposure time is shown on the left hand side of each spectrum.

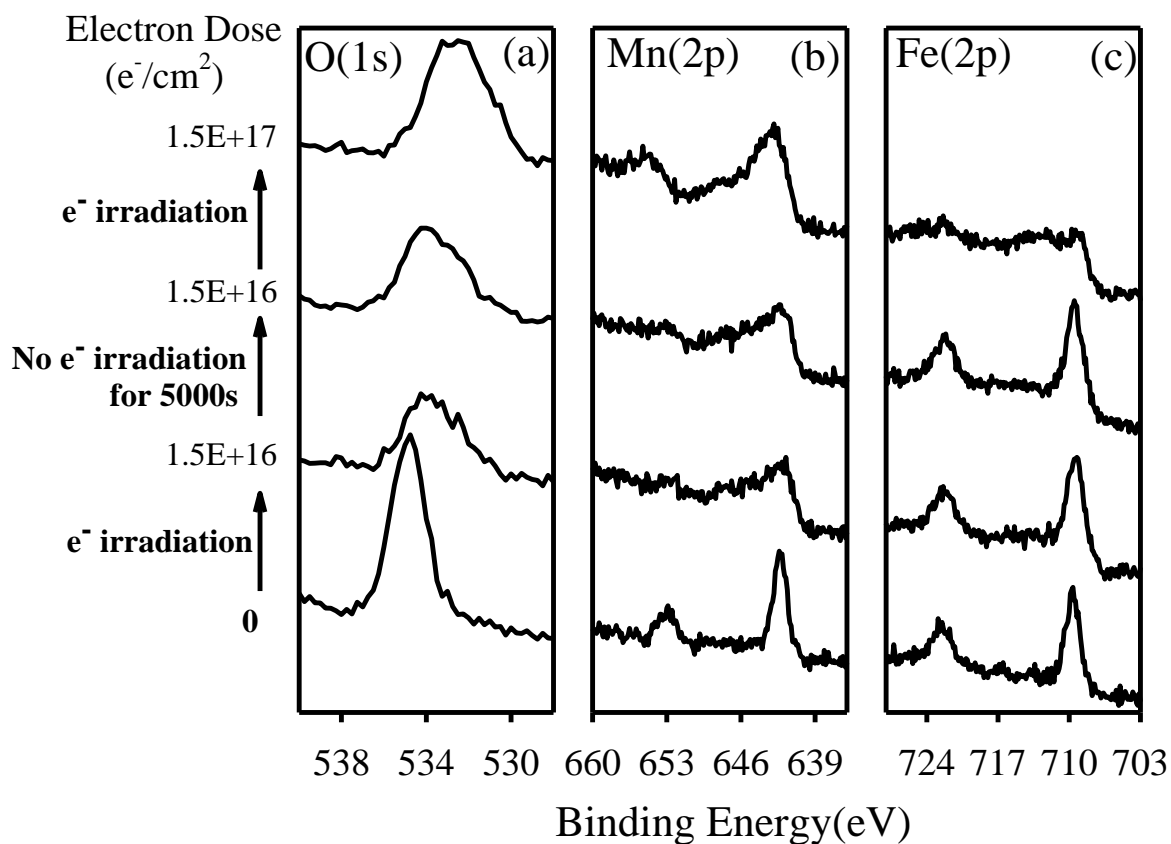

**Figure S2** Evolution of (a) Fe(2p), (b) Mn(2p) and (c) O(1s) XPS regions for ~1.1 nm thick film of ( $\eta^5$ -C<sub>5</sub>H<sub>5</sub>)Fe(CO)<sub>2</sub>Mn(CO)<sub>5</sub> adsorbed onto an amorphous carbon (a:C) substrate at 190 K and exposed to electrons in the presence of a measurable partial pressure of H<sub>2</sub>O molecules in the UHV chamber. After an initial electron irradiation of 500s (electron dose of  $1.5 \times 10^{16}$  e<sup>-</sup>/cm<sup>2</sup>), the electron gun was switched off for 5000s and then on for 5000s to control for the effect of electrons on the oxidation of Fe atoms by H<sub>2</sub>O
